# Supplementary material for: Effect of Different Biofertilizer Applications on Soil Health, Tomato Growth, and Yield
Source: Research Square preprint supplement (doi:10.21203/rs.3.rs-8524005/v1), 2026-02-05
Supplement: Supplementary file 1 [file 71791f45c7f30a17b06745fb.docx]

**Suppl. Table 1.** Plant height of tomato at different DAT.

| **Plant Height (cm)** | | | | |
| --- | --- | --- | --- | --- |
| **Treatments** | **30 DAT** | **45 DAT** | **60 DAT** | **90 DAT** |
| T0 | 32.33b | 48.67c | 60.67b | 66.67c |
| T1 | 38.67ab | 53.67bc | 69a | 77ab |
| T2 | 41ab | 58ab | 71.33a | 77.67ab |
| T3 | 39ab | 57.67b | 72.33a | 74.33bc |
| T4 | 44ab | 60.33ab | 70a | 80.67ab |
| T5 | 46a | 65.67a | 75a | 84.67a |
| LSD (0.05) | 12.13 | 7.97 | 7.88 | 10.24 |
| CV % | 10.65 | 4.90 | 3.99 | 4.70 |

T0 = Control, T1 = recommended dose of chemical fertilizer (RDF), T2 = (75% RDF) + Azotobacter, T3 = (75% RDF) +Phosphorus Solubilizing bacteria (PSB), T4 = (75% RDF) + PSB+Azotobacter, T5= (75% RDF) + PSB + Azotobacter + Trichoderma; DAT- Days after transplanting.
